# Supplementary material for: Azadirachta indicaAttenuates Cisplatin-Induced Nephrotoxicity and Oxidative Stress
Source: Hindawi journal article supplement (doi:10.1155/2014/647131), 2014-01-01
Supplement: f1 [file 647131.f1.pdf]

**Table S1.** Effects of methanolic leaves extract of neem on different parameters of rats.

|                            | <b>Groups</b>  | <b>Uric acid<br/>(mg/dL)</b>     | <b>Urea<br/>(mg/dL)</b>         | <b>Creatinine<br/>(mg/dL)</b>      |                                     |                               |
|----------------------------|----------------|----------------------------------|---------------------------------|------------------------------------|-------------------------------------|-------------------------------|
| <b>Kidney function</b>     | <b>Control</b> | 55.76±2.63                       | 2.97±0.15                       | 0.55±0.04                          |                                     |                               |
|                            | <b>MLEN</b>    | 63.55±1.11*                      | 2.77±0.03                       | 0.51±0.01                          |                                     |                               |
| <b>Oxidant markers</b>     |                | <b>MDA<br/>(nmol/mg protein)</b> | <b>NO<br/>(µmol/mg protein)</b> | <b>GSH<br/>(nmol/mg protein)</b>   |                                     |                               |
|                            | <b>Control</b> | 50.66±2.43                       | 8.15±0.34                       | 16.72±0.41                         |                                     |                               |
| <b>MLEN</b>                | 56.49±2.29     | 10.76±0.64*                      | 17.25±0.47                      |                                    |                                     |                               |
| <b>Antioxidant enzymes</b> |                | <b>SOD<br/>(U/mg protein)</b>    | <b>CAT<br/>(U/mg protein)</b>   | <b>GR<br/>(µmol/hr/mg protein)</b> | <b>GST<br/>(µmol/hr/mg protein)</b> | <b>GPx<br/>(U/mg protein)</b> |
|                            | <b>Control</b> | 2.52±0.16                        | 9.16±0.58                       | 12.43±1.05                         | 0.07±0.003                          | 64.37±3.36                    |
| <b>MLEN</b>                | 2.31±0.22      | 9.71±0.36                        | 16.76±1.12*                     | 0.07±0.002                         | 75.32±2.74*                         |                               |

Values are means ± SEM (n=7)

\* $p < 0.05$ , significant change with respect to **Control**.

**Table S2.** Quantitative analysis of NF- $\kappa$ B immunoreactivity and PI cells in the kidney of rats on different treated groups.

| Units                                                 | Control        | CP              | N-CP                          | PC-N                          |
|-------------------------------------------------------|----------------|-----------------|-------------------------------|-------------------------------|
| Average % NF- $\kappa$ B positive cells in the kidney | 2.4 $\pm$ 0.41 | 89.6 $\pm$ 3.54 | 65.3 $\pm$ 4.78 <sup>ab</sup> | 28.5 $\pm$ 2.82 <sup>ab</sup> |
| Number of PI positive cells/section                   | 13 $\pm$ 2     | 164 $\pm$ 21    | 51 $\pm$ 8 <sup>ab</sup>      | 27 $\pm$ 9 <sup>ab</sup>      |

<sup>a</sup> $p$ <0.05, significant change with respect to **Control**; <sup>b</sup> $p$ <0.05, significant change with respect to **CP** for Duncan's post hoc test.
